# Supplementary material for: Temperature-dependent growth of protein crystals with temperature-independent solubility: case study of apoferritin
Source: Royal Society of Chemistry journal article supplement (doi:10.1039/d0ce00654h), 2020-01-01
Supplement: d0ce00654h1.pdf [file d0ce00654h1.pdf]

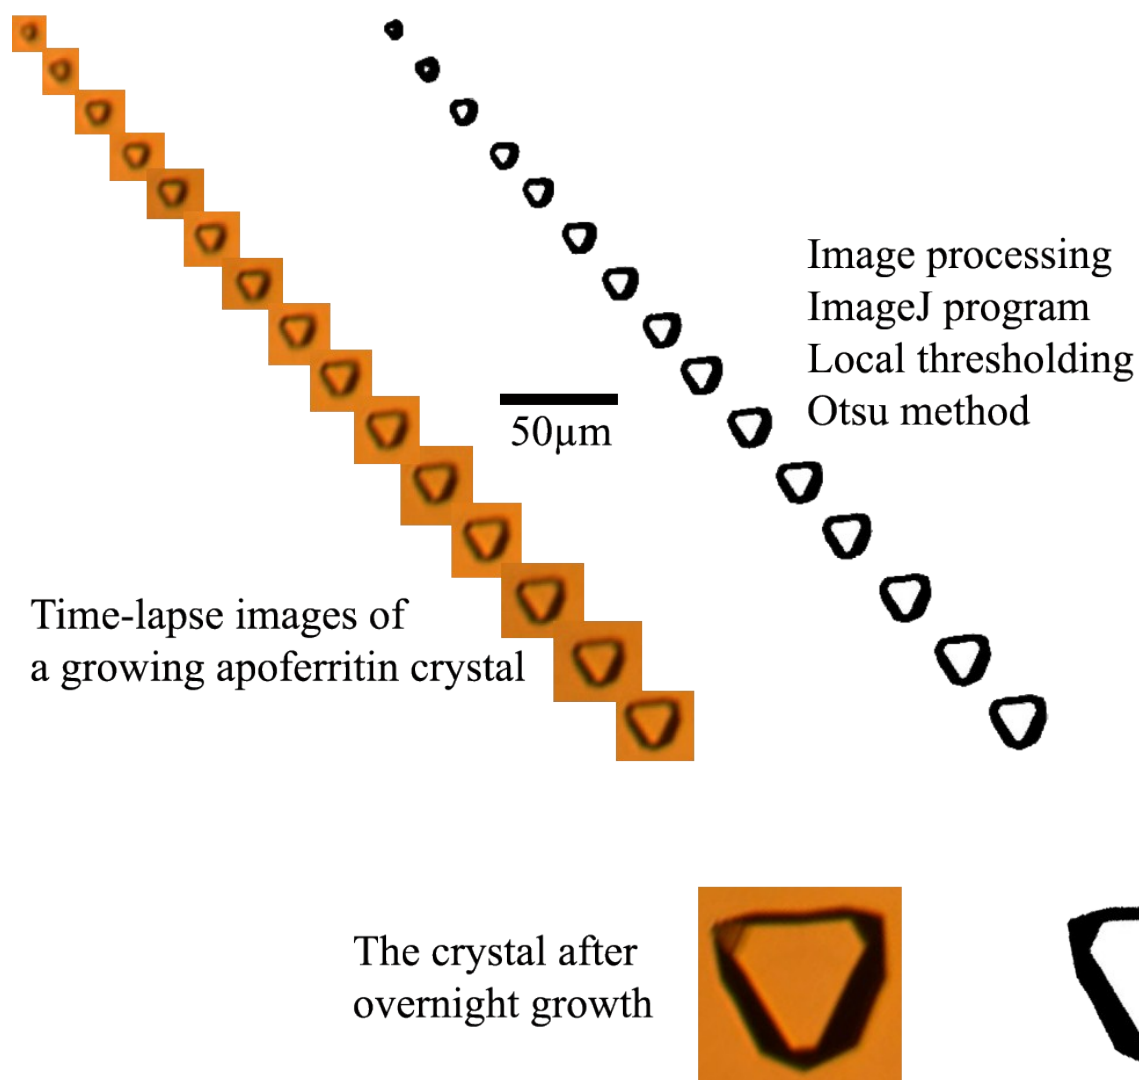

**Figure S1.** Example of time-lapse images of a single progress of crystal growth (left). The result from the image processing is shown in the right. A local thresholding is chosen, because it makes the image processing insensitive to cropping or presence of pixel inhomogeneity outside the very image of the crystal. The Otsu thresholding method is chosen, because its result appears to be in the best conformity with the eye perception.
