# Supplementary material for: Temperature-dependent growth of protein crystals with temperature-independent solubility: case study of apoferritin
Source: Royal Society of Chemistry journal article supplement (doi:10.1039/d0ce00654h), 2020-01-01
Supplement: d0ce00654h2.pdf [file d0ce00654h2.pdf]

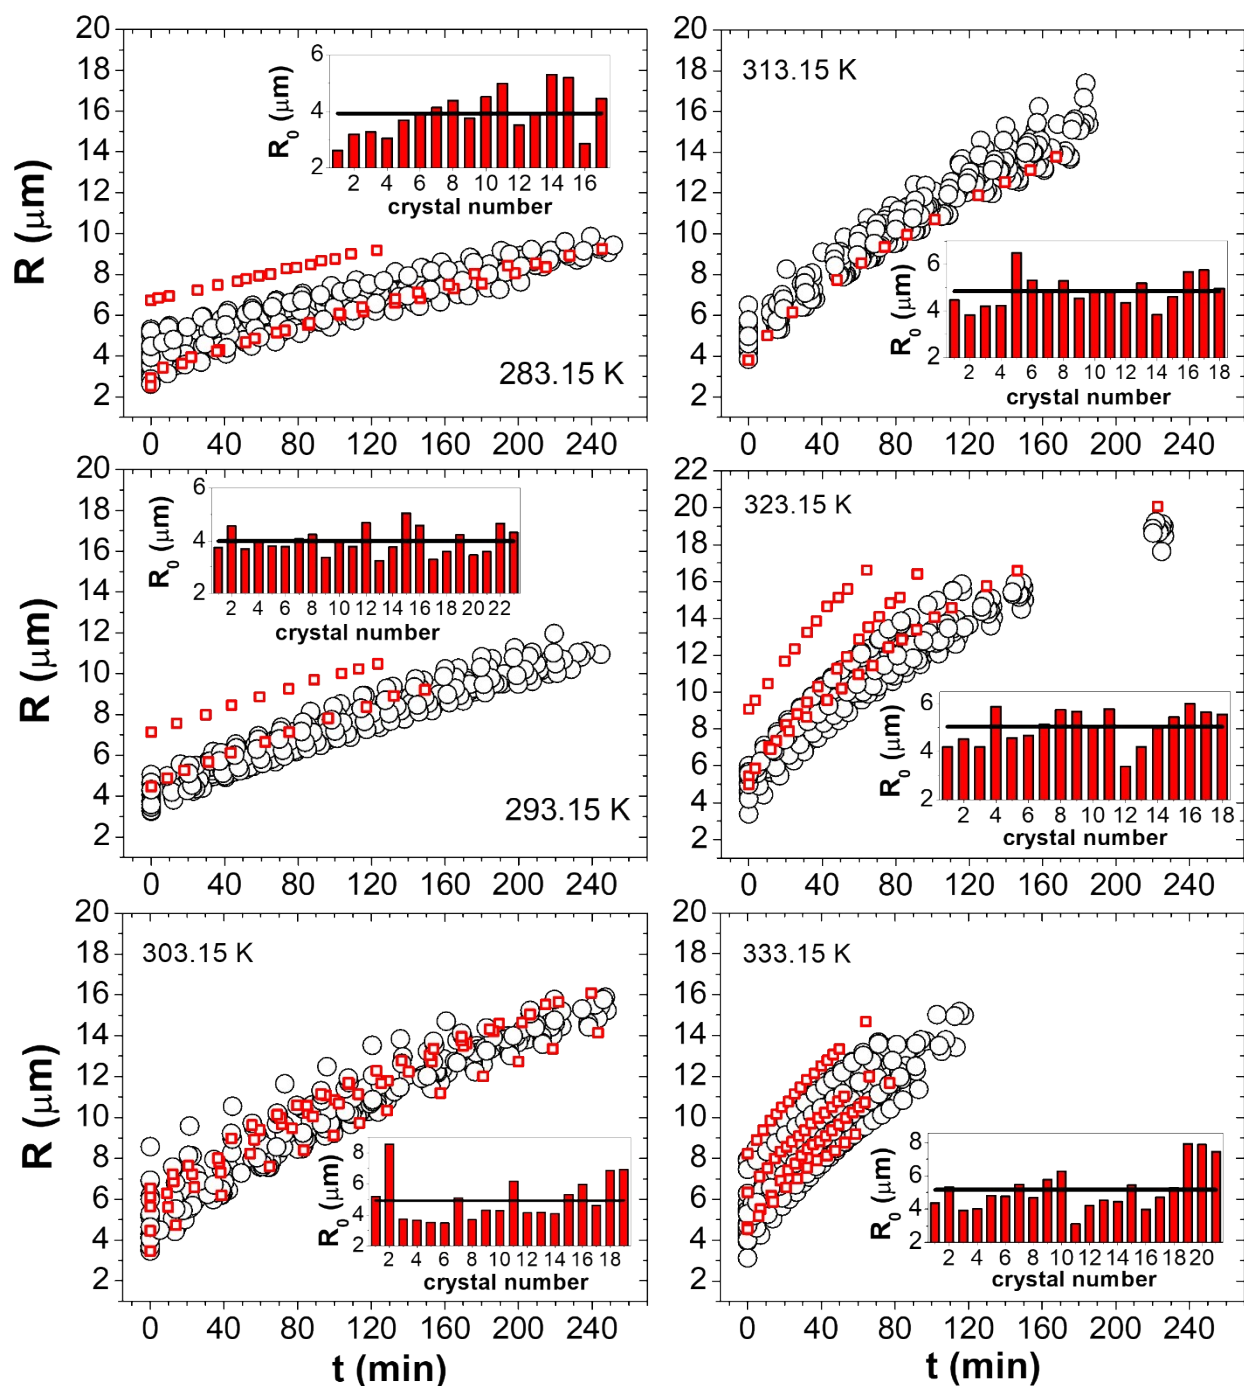

**Figure S2.** Initial apoferritin crystal growth data at fixed temperature (as indicated). Each circle represents the effective radius  $R$  of an individual crystal at a given time  $t$  of the crystal growth evolution. Red squares represent the  $R(t)$  data that were omitted from further consideration, because their analysis led to obtaining of  $G_d$  or  $G_i$  values that were recognized as outliers according to the interquartile range rule (see ref. [22]). The insets show the distribution of the crystal size  $R_0$  and the mean  $R_0$  value (horizontal lines).
