# Supplementary material for: Temperature-dependent growth of protein crystals with temperature-independent solubility: case study of apoferritin
Source: Royal Society of Chemistry journal article supplement (doi:10.1039/d0ce00654h), 2020-01-01
Supplement: d0ce00654h3.pdf [file d0ce00654h3.pdf]

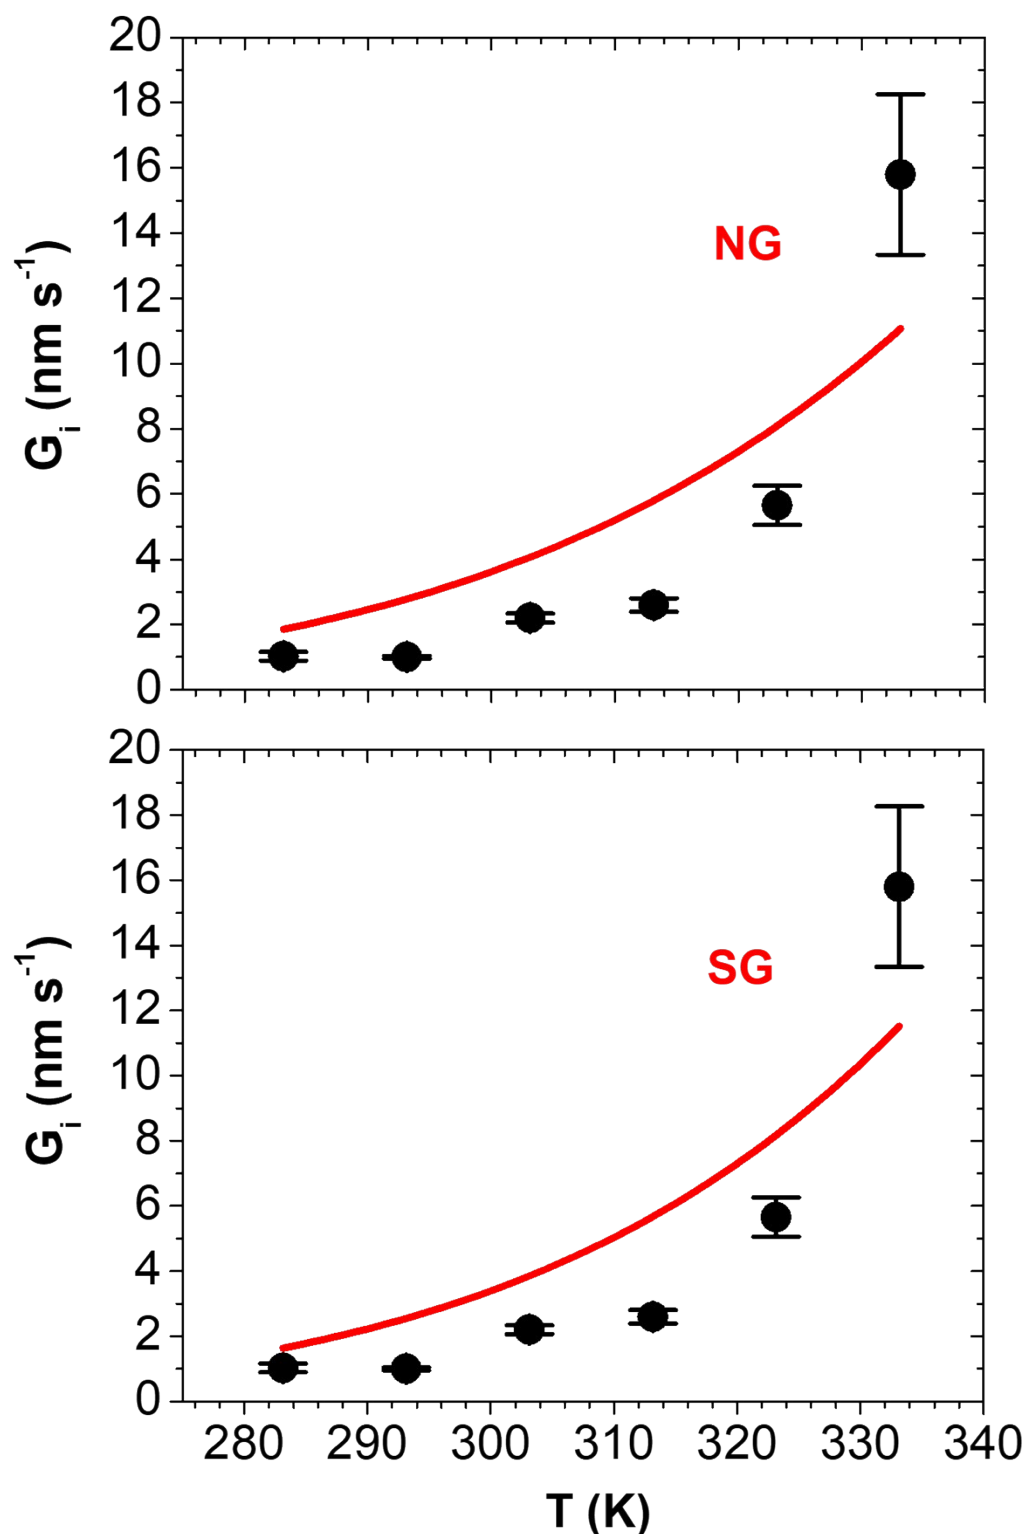

**Figure S3.** Fits of eqn (10) (normal growth) and eqn (11) (spiral growth) to the experimental  $G_i(T)$  data. The fits are done with activation energy  $E = 28 \text{ kJ mol}^{-1}$  and only one free parameter  $A_N$  (or  $A_S$ ). The squared correlation coefficients of the fits are  $r^2 = 0.72$  and  $r^2 = 0.76$  for NG and SG, respectively.
